# Supplementary material for: Pt/C electrocatalysts derived from recycled Pt/Re mixed solutions: synthesis, characterization, and electrochemical behaviour in fuel cells
Source: Royal Society of Chemistry journal article supplement (doi:10.1039/d3gc02940a), 2023-01-01
Supplement: d3gc02940a1.pdf [file d3gc02940a1.pdf]

## Supporting information

### **Pt/C electrocatalyst derived from recycled Pt/Re mixed solution: synthesis, characterization, and electrochemical behavior in fuel cell**

Jian Cui <sup>a</sup>, Fengshan Yu <sup>a</sup>, Maolin Tian <sup>a</sup>, Chengcheng Yan <sup>a</sup>, Tongjun Shen <sup>a</sup>, Xueli Wang <sup>a</sup>, Umme Hani Prova <sup>a</sup>, Chunxia Wang <sup>a,\*</sup>, Guoyong Huang <sup>a,\*</sup>, Shengming Xu <sup>b</sup>

<sup>a</sup> State Key Laboratory of Heavy Oil Processing, College of New Energy and Materials, China University of Petroleum (Beijing), Beijing 102249, China.

<sup>b</sup> Beijing Key Lab of Fine Ceramics, Institute of Nuclear and New Energy Technology, Tsinghua University, Beijing, 100084, China.

\* Corresponding authors: E-mail: cxwang@iccas.ac.cn; huanggy@cup.edu.cn.

## 1. Materials

The spent catalyst was obtained by China National Petroleum Corporation (CNPC). Carbon black Vulcan XC-72R was purchased from Cabot, China. Chloroplatinic acid hexahydrate ( $\text{H}_2\text{PtCl}_6 \cdot 6\text{H}_2\text{O}$ , 99.9%, Pt:37.5%+) was obtained from Adamas, China. Ethylene glycol (EG, 99%) were purchased from Innochem, China. Sodium hydroxide (NaOH, 96%), Sodium carbonate ( $\text{Na}_2\text{CO}_3$ ) and perchloric acid ( $\text{HClO}_4$ , 70%) were purchased from Aladdin, China. Isopropyl alcohol (IPA,  $\geq 99.7\%$ ), Hydrochloric acid (HCl, 36-38%), Hydrogen peroxide ( $\text{H}_2\text{O}_2$ ,  $\geq 30\%$ ) and Sulfuric acid ( $\text{H}_2\text{SO}_4$ , 95-98%) were purchased from Greagent, China. The D520 Nafion solution (5 wt%) and D2020 Nafion solution (20 wt%) was obtained from Dupont. The 20 wt% commercial Pt/C and 60 wt% commercial Pt/C were obtained from (TANAKA, Japan.) and Wuhan Himalaya Technology Co., China. Deionized water was obtained through an ultra-pure purification system. All reagents were of analytical grade and were used with no further purification.

## 2. Characterization

UV-vis spectrophotometry (UV-2600, Japan) was applied to trace the coordination process. X-ray diffraction (XRD) measurements were performed, using a diffractometer (DX2700BH, China) with Cu  $K\alpha$  radiation. ICP-OES inductively coupled plasma optical emission spectroscopy (Avio 200) was used to determine the loadings of Pt in the catalysts; the mass activity was further obtained according to Pt loading. The surface morphologies of the MW-Pt/C and TANAKA 20 wt% commercial Pt/C catalysts were observed by field emission transmission electron microscope

(Tecnai G2 F20 S-Twin, American). The X-ray photoelectron spectroscopy spectra (XPS) were collected by XPS (Thermo Fisher ESCALAB 250Xi).

Calculation of Pt nanoparticle size based on XRD can be calculated by the Scherrer formula<sup>1, 2</sup>:

$$\bar{D} = K\lambda / (\text{FWHM} \cos \theta)$$

where  $\lambda$  is the wavelength,  $\bar{D}$  is the volume averaged particle size,  $K = 0.89$  is the Scherrer constant, FWHM is the full width at half-maximum of the peak, and  $\theta$ , the Bragg angle of the [hkl] reflection.

### 3. Electrode preparation

2.5 mg of catalyst was ultrasonically dispersed in 1 mL of solution containing 800  $\mu\text{L}$  of IPA, 180  $\mu\text{L}$  of water and 20  $\mu\text{L}$  of Nafion solution for 30 min. The glassy carbon electrode surface was wiped by a polishing kit with 0.05  $\mu\text{m}$  alumina particles which were later washed with deionized water. After a uniform mixture formed 10  $\mu\text{L}$  of the above solution was coated to a precleaned glassy carbon electrode (area=0.19625  $\text{cm}^2$ ). The Pt loading is about 25.48  $\mu\text{g}_{\text{Pt}}/\text{cm}^2$ . TANAKA 20 wt% commercial Pt/C ink was also prepared and coated as per similar Pt loading achieved.

### 4. Electrochemical tests

Electrochemical measurements were performed on a CHI 760 electrochemical workstation combined with a RDE (ALS, Japan). The working electrode is a glassy carbon electrode with a diameter of 5 mm. The counter electrode is a carbon electrode, and the reference electrode is a  $\text{Hg}/\text{Hg}_2\text{SO}_4$  electrode, the potentials measured using the  $\text{Hg}/\text{Hg}_2\text{SO}_4$  electrode can be converted to RHE by the following equation<sup>3, 4</sup>:

$$E \text{ (vs. RHE)} = E \text{ (vs. Hg/Hg}_2\text{SO}_4) + 0.652 + 0.0592\text{pH}$$

Cyclic voltammogram (CV) were measured in reference to the RHE in N<sub>2</sub> saturated 0.1 mol/L HClO<sub>4</sub> from 0.05 V to 1.1 V at a scan rate of 50 mV/s. Linear sweep voltammetry (LSV) curves were measured in reference to RHE in O<sub>2</sub>-saturated 0.1 M HClO<sub>4</sub> electrolyte from 0.05 V to 1.1 V at a scan rate of 10 mV/s and a rotating speed of 1600 rpm. To further evaluate the electrochemical durability of the Pt-NPC, an accelerated degradation test (ADT) was carried out in reference to RHE in O<sub>2</sub> saturated 0.1 mol/L HClO<sub>4</sub> at scan rate of 100 mV/s for 5000 cycles at 0.6–1.1 V. The electrochemically active surface area (ECSA) was calculated based on the hydrogen underpotential deposition (HUPD) method with the following equation<sup>5, 6</sup>:

$$\text{ECSA} = \frac{Q_H}{2.1 \times M_{\text{Pt}} \times v} (\text{m}^2 / \text{g}_{\text{Pt}}) \quad (1)$$

where Q<sub>H</sub> is the charge from the hydrogen adsorption/desorption (HAD) region of CVs; M<sub>Pt</sub> represents Pt loading on the glassy carbon electrode (g); v represents the scan rate (V/s).

The mass activity (MA) and specific activity (SA) were calculated by the following formula<sup>5, 7</sup>:

$$\frac{1}{j} = \frac{1}{j_k} + \frac{1}{j_L} \quad (2)$$

$$\text{MA} = \frac{j_k \times S}{M_{\text{Pt}}} (\text{A} / \text{mg}_{\text{Pt}}) \quad (3)$$

$$\text{SA} = \frac{100 \times j_k \times S}{M_{\text{Pt}} \times \text{ECSA}} (\text{mA} / \text{cm}^2) \quad (4)$$

where j represents the current density measured by the experiment (mA/cm<sup>2</sup>); j<sub>k</sub> represents the dynamic current density (mA/cm<sup>2</sup>); j<sub>L</sub> is the limiting current diffusion

density measured by the experiment ( $\text{mA}/\text{cm}^2$ ).  $S$  is the electrode area ( $\text{cm}^2$ ).  $M_{\text{Pt}}$  is the loading of Pt (g).

## 5. MEA measurement

Membrane electrode assemblies (MEAs) were prepared with M-50 (20 wt%) and TANAKA 20 wt% commercial Pt/C as the cathode, respectively. Commercial Pt/C (60 wt%, Wuhan Himalaya Optoelectronics Technology Co., Ltd.) was used as the anode. The Nafion ionomer (D2020, Dupont). 37 mg catalysts, 6.4 g water, 60 mg ionomer and 6.5 g IPA are mixed uniformly under ultrasonic treatment to obtain catalyst slurry. The prepared catalyst inks were directly coated on a M820.15 membrane (Gore, 15  $\mu\text{m}$ ). The cathode catalyst loadings were both  $0.1 \text{ mg}_{\text{Pt}}/\text{cm}^2$  for M-50 and TANAKA 20 wt% commercial Pt/C, with corresponding anode catalyst loading of  $0.1 \text{ mg}_{\text{Pt}}/\text{cm}^2$ . The prepared MEAs ( $5 \text{ cm}^2$  active electrode area) were hot-pressed with the gas diffusion layer (GDL, Sigracet 29BC,  $0.235 \pm 0.025 \text{ nm}$ ) at  $130 \text{ }^\circ\text{C}$  and pressure of 1.4 MPa for 2 minutes. Performance of the single cells was all measured at  $85 \text{ }^\circ\text{C}$  with a back-pressure of 0.15 MPa using a fuel cell test station (HS330). To measure I-V polarization curves,  $80 \text{ }^\circ\text{C}$  and 100% humidified hydrogen (800 sccm) and oxygen (1500 sccm) were supplied into the anode and cathode, respectively.

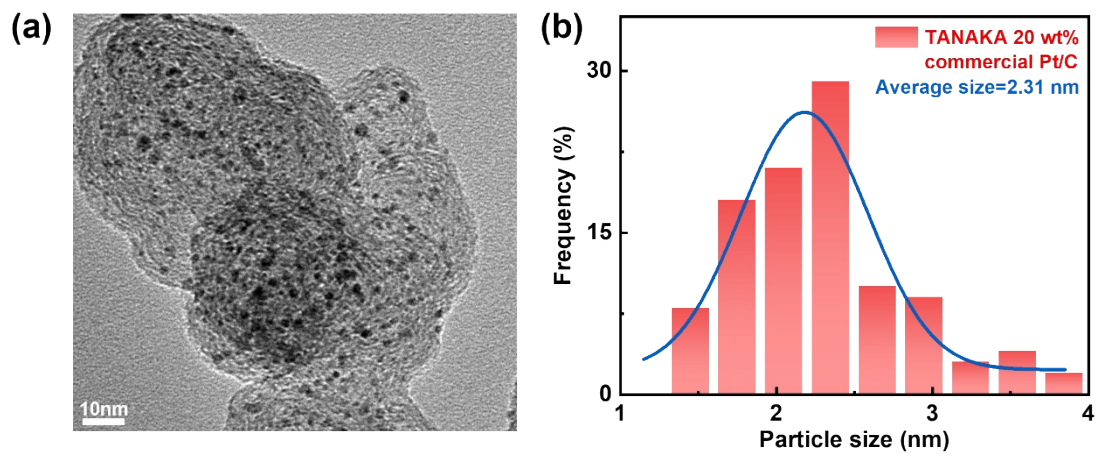

**Fig. S1** (a) TEM image of TANAKA 20 wt% commercial Pt/C; (b) Pt nanoparticles size distribution.

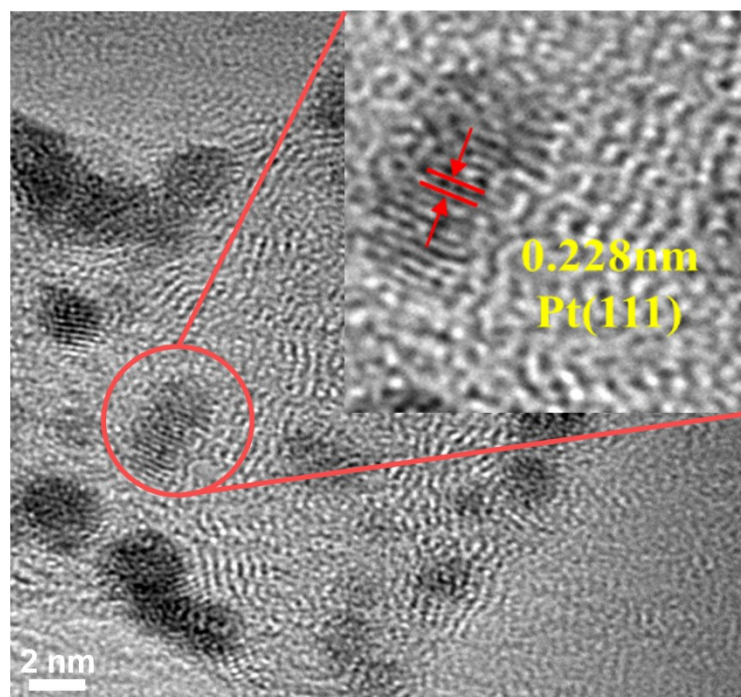

**Fig. S2** High-resolution TEM image of M-50.

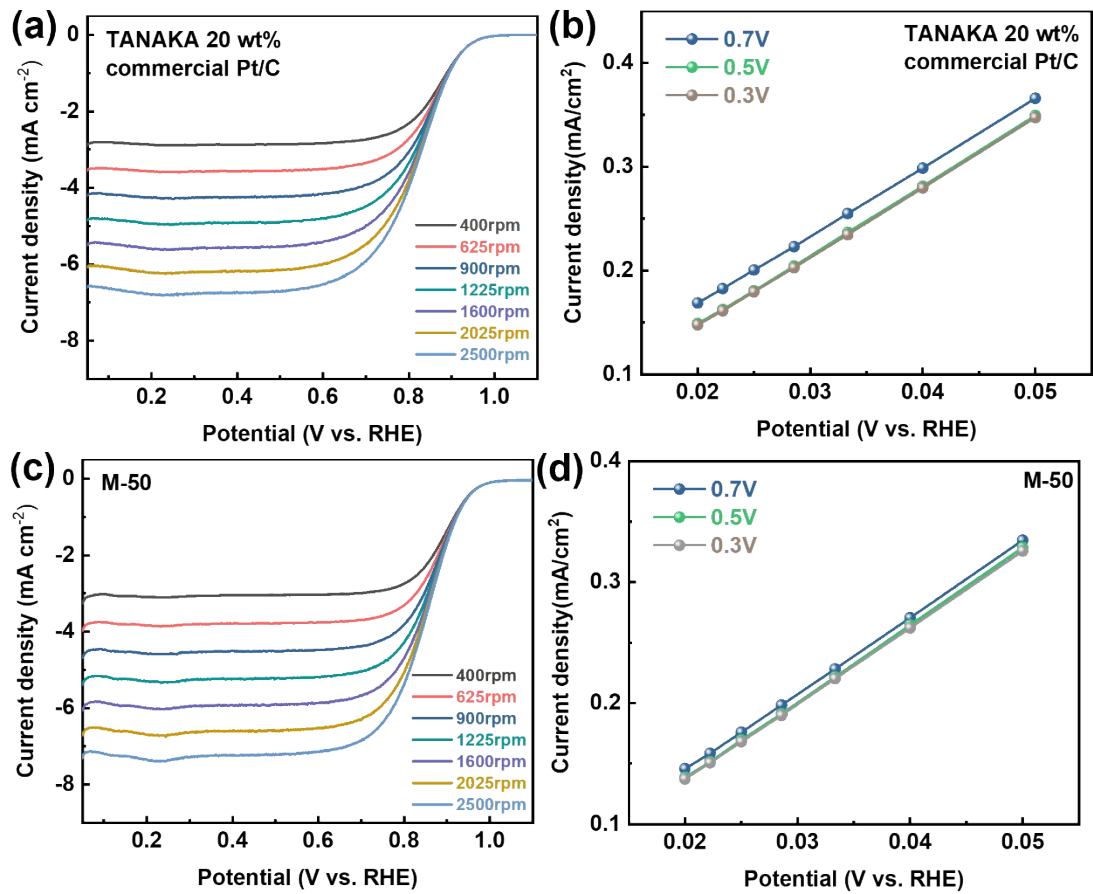

**Fig. S3** LSV curves at various rotation rates and the Koutecky-Levich plots that was obtained at 0.3 V, 0.5 V and 0.7 V versus RHE of TANAKA 20 wt% commercial Pt/C (a,b) and M-50 (c,d).



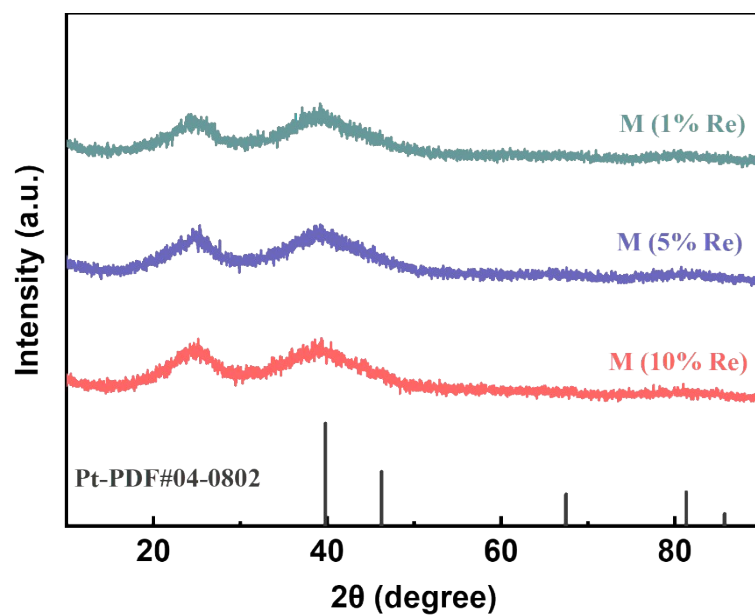

**Fig.S4** The X-ray diffraction patterns of M (Re) electrocatalysts.

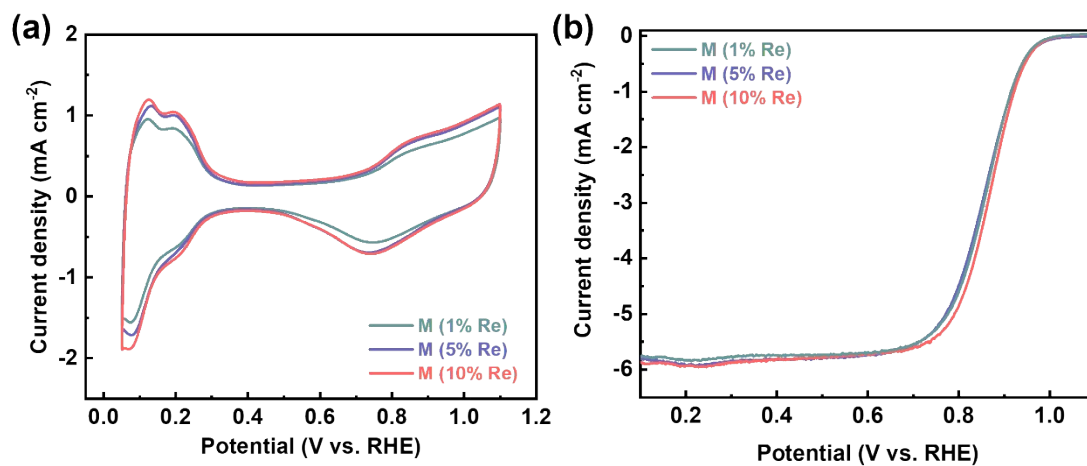

**Fig.S5** The electrochemical tests of M (Re) electrocatalysts (a) CV; (b) LSV.

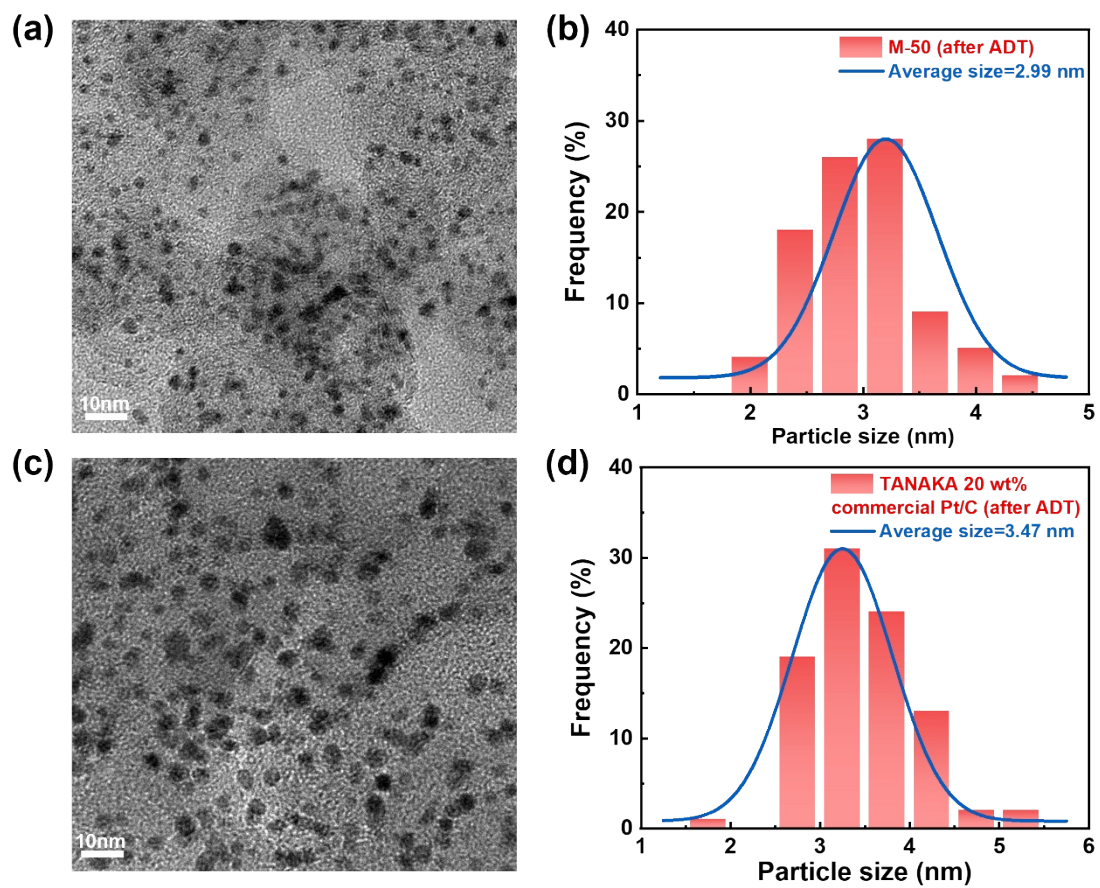

**Fig. S6** TEM image of electrocatalysts and Pt size distribution: (a, b) M-50; (c, d) TANAKA 20 wt% commercial Pt/C.

**Table S1.** The contents of Pt and Re in the M(Re) electrocatalysts were determined by ICP-OES.

| Samples  | Pt (wt%) | Re (wt%) |
|----------|----------|----------|
| M(1%Re)  | 19.75    | —        |
| M(5%Re)  | 19.54    | —        |
| M(10%Re) | 19.28    | —        |

**Table S2.** The contents of Pt in the electrocatalysts were determined by ICP-OES.

| Samples                       | Pt (wt%) |
|-------------------------------|----------|
| M-110                         | 20.67    |
| M-80                          | 21.18    |
| M-50                          | 19.41    |
| M-20                          | 19.93    |
| TANAKA 20 wt% commercial Pt/C | 19.98    |

**Table S3.** The FWHM (full width at half maxima) and Pt particle size according to XRD and TEM information of electrocatalysts.

| Samples                          | FWHM    | Crystallite size                 | Particle size                  |
|----------------------------------|---------|----------------------------------|--------------------------------|
|                                  |         | according to XRD<br>pattern (nm) | according to TEM<br>image (nm) |
| M-110                            | 1.70265 | 5.18                             | 2.94                           |
| M-80                             | 5.13973 | 1.71                             | 2.21                           |
| M-50                             | 6.27061 | 1.41                             | 2.04                           |
| M-20                             | 8.03012 | 1.10                             | 1.83                           |
| TANAKA 20 wt%<br>commercial Pt/C | 3.22893 | 2.73                             | 2.31                           |

**Table S4.** Electrochemical performance of electrocatalysts.

| Catalysts                        | $E_{1/2}$<br>(V vs.RHE) | ECSA<br>( $\text{m}^2/\text{g}_{\text{Pt}}$ ) | MA<br>( $\text{A}/\text{mg}_{\text{Pt}}$ ) | SA<br>( $\text{mA}/\text{cm}^2$ ) |
|----------------------------------|-------------------------|-----------------------------------------------|--------------------------------------------|-----------------------------------|
| M-110                            | 0.8372                  | 41.38                                         | 0.0428                                     | 0.1035                            |
| M-80                             | 0.8522                  | 58.61                                         | 0.0653                                     | 0.1114                            |
| M-50                             | 0.8622                  | 109.81                                        | 0.0890                                     | 0.0810                            |
| M-20                             | 0.8542                  | 62.04                                         | 0.0657                                     | 0.1060                            |
| TANAKA 20 wt%<br>commercial Pt/C | 0.8472                  | 44.01                                         | 0.0592                                     | 0.1345                            |

## References

1. I. N. Leontyev, S. V. Belenov, V. E. Guterman, P. Haghi-Ashtiani, A. P. Shaganov and B. Dkhil, *J. Phys. Chem. C*, 2011, **115**, 5429-5434.
2. I. N. Leontyev, V. E. Guterman, E. B. Pakhomova, P. E. Timoshenko, A.V.Guterman, I. N. Zakharchenko, G. P. Petin and B. Dkhil, *J. Alloy. Compd.*, 2010, **500**, 241-246.
3. C. Wei, R. R. Rao, J. Peng, B. Huang, I. E. L. Stephens, M. Risch, Z. J. Xu and Y. Shao-Horn, *Adv. Mater.*, 2019, **31**, 1806296.
4. K. J. J. Mayrhofer, S. J. Ashton, J. Kreuzer and M. Arenz, *Int. J. Electrochem. Sci.*, 2009, **4**, 1-8.
5. Y.-F. Xia, P. Guo, J.-Z. Li, L. Zhao, X.-L. Sui, Y. Wang and Z.-B. Wang, *iScience*, 2021, **24**, 103024.
6. C. Wei, S. Sun, D. Mandler, X. Wang, S. Z. Qiao and Z. J. Xu, *Chem. Soc. Rev.*, 2019, **48**, 2518-2534.
7. Z. Zhu, Q. Liu, X. Liu and J. Shui, *J. Phys. Chem. C*, 2020, **124**, 3069-3079.
